# Supplementary material for: Trinuclear palladium addition to unsaturated carbocycles
Source: Royal Society of Chemistry journal article supplement (doi:10.1039/c3dt51018b), 2013-01-01
Supplement: c3dt51018b.pdf [file c3dt51018b.pdf]

## Supplementary Materials

### Trinuclear Palladium Addition to Unsaturated Carbocycles

Tetsuro Murahashi,<sup>a,b,\*</sup> Kohei Takase,<sup>c</sup> Kentaro Usui,<sup>c</sup> Seita Kimura,<sup>a,c</sup> Mayu Fujimoto,<sup>c</sup>  
Tomohito Uemura,<sup>c</sup> Sensuke Ogoshi,<sup>c</sup> and Koji Yamamoto<sup>a</sup>

<sup>a</sup>*Institute for Molecular Science*

<sup>b</sup>*PRESTO, Japan Science and Technology Agency  
Myodaiji, Okazaki, Aichi, 444-8787, Japan*

<sup>c</sup>*Department of Applied Chemistry, Graduate School of Engineering, Osaka University  
Suita, Osaka, 565-0871, Japan*

## Experimental Section

**General Consideration.** All manipulations were conducted under a nitrogen atmosphere using standard Schlenk or drybox techniques.  $^1\text{H}$ ,  $^{13}\text{C}\{^1\text{H}\}$  NMR spectra were recorded on 400 MHz (JEOL GSX-400, Bruker DPX-400), 500 MHz (JEOL JNM-A500), and 600 MHz (Varian Unity-Inova 600) instruments. The chemical shifts were referenced to the residual resonances of deuterated solvents. Elemental analyses were performed at the Instrument Center, Institute for Molecular Science, and the Analytical Center, Faculty of Engineering, Osaka University. High-resolution ESI-MS analyses were performed by Bruker micrOTOF ESI-TOF. X-ray crystal data were collected by Rigaku RAXIS-RAPID Imaging Plate diffractometer. Unless specified, all reagents were purchased from commercial suppliers and used without purification. Nitromethane, diethyl ether, dichloromethane, benzene, acetonitrile,  $\text{CD}_3\text{NO}_2$ , and  $\text{CD}_2\text{Cl}_2$  were purified according to the standard procedures.  $[\text{Pd}_2(\text{CH}_3\text{CN})_6][\text{BF}_4]_2$ ,<sup>1</sup>  $\text{NaB}(\text{Ar}^{\text{F}})_4$ ,<sup>2</sup> and  $[\text{Pd}_2(\text{CH}_3\text{CN})_6][\text{PF}_6]_2$ <sup>3</sup> were prepared according to the literature.

**Synthesis of  $[\text{Pd}_3(\mu_3\text{-[2.2]paracyclophane})(\text{phen})_3][\text{BF}_4]_2$  (**3**):** To a solution of  $[\text{Pd}_2(\text{CH}_3\text{CN})_6][\text{BF}_4]_2$  (100 mg, 0.16 mmol) in a mixture of  $\text{CH}_2\text{Cl}_2$  (ca. 40 mL) and  $\text{CH}_3\text{CN}$  (ca. 5 mL) was added [2.2]paracyclophane (165 mg, 0.79 mmol) and  $\text{Pd}_2(\text{dba})_3$  (82 mg, 0.079 mmol), and the mixture was stirred for 1 h at room temperature. Addition of 1,10-phenanthroline (85 mg, 0.47 mmol) to the mixture resulted in precipitation of a red powder. After the volatiles were removed in vacuo, the red powder was dissolved in nitromethane, and the solution was filtrated. Addition of  $\text{Et}_2\text{O}$  to the filtrate gave a red powder. Recrystallization from  $\text{CH}_3\text{NO}_2$ /benzene gave red crystals of **3** (93.5 mg) in 48% yield.  $^1\text{H}$  NMR(400 MHz,  $\text{CD}_3\text{NO}_2$ , 25 °C):  $\delta$  9.66 (br, 1H, H7), 9.62 (br, 2H, H15), 8.84 (d,  $^3J = 6$  Hz, 1H, H9), 8.61 (br, 4H, H17, H20 or 22), 8.30 (m, 1H, H8), 8.04 (d,  $^3J = 8.8$  Hz, 1H, H10), 7.99 (d,  $^3J = 8.8$  Hz, 2H, H20 or 22), 7.93 (d,  $^3J = 8.8$  Hz, 2H, H18 or 19), 7.86 (m, 2H, H16), 7.71 (m, 4H, H11, H12 or 14, H18 or 19), 7.53 (s, 2H, H2), 7.41 (s, 2H, H1), 7.32 (m, 1H, H12 or 14), 6.74 (m, 2H, H21), 5.95 (m, 1H, H13), 4.78 (s, 2H, H5), 4.75 (s, 2H, H6), 3.17 (m, 4H, H3), 2.78 (m, 4H, H4).  $^{13}\text{C}\{^1\text{H}\}$  NMR (100.6 MHz,  $\text{CD}_3\text{NO}_2$ , 25 °C)  $\delta$  155.1 (s, C26 or 28), 153.8 (s, C19), 153.3 (s, C16 or 18), 150.8 (s, C9), 146.6 (s), 146.5(s), 146.2

(s), 140.6 (s, C7), 140.2 (s, C21), 139.9 (s, C11), 139.1 (s, C26 or 28), 138.3 (s, C14 or 16 or 18), 133.0 (s, C2), 132.8 (s, C1), 132.0 (s), 131.4 (s), 130.7 (s), 130.4 (s), 129.7 (s), 128.6 (s, C23 or 24), 128.6 (s, C23 or 24), 128.5 (s, C13), 127.3 (s, C10), 126.9 (s, C20), 125.4 (s, C27), 125.0 (s, C17), 106.0 (s, C8), 68.9 (s, C6), 67.7 (s, C5), 37.7 (s, C4), 35.3 (s, C3). Anal. Calcd. For.  $C_{52}H_{40}B_2F_8N_6Pd_3 \cdot CH_3NO_2$ : C, 48.86; H, 3.33; N, 7.53. Found: C, 48.34; H, 3.37; N, 6.76.

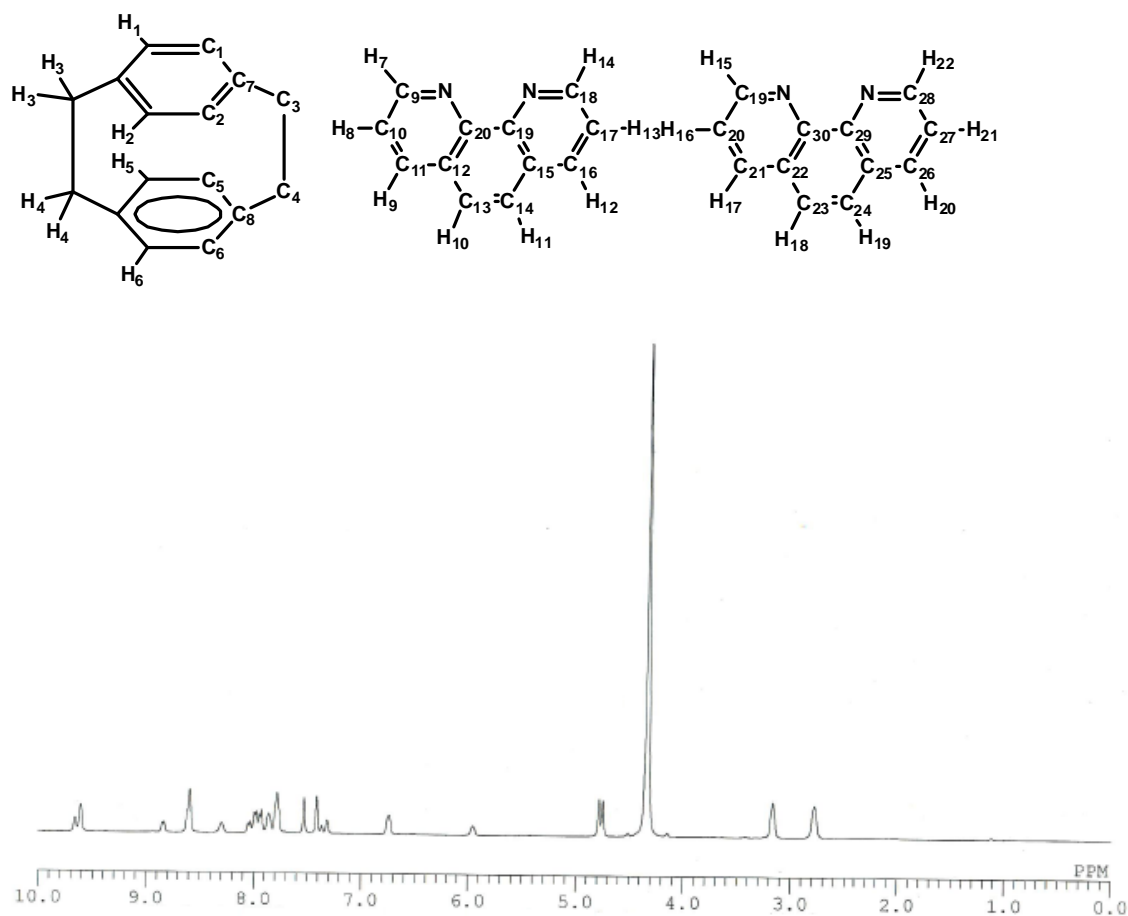

**Figure S1.** A  $^1H$  NMR spectrum of  $[Pd_3(\mu_3\text{-}[2.2]\text{paracyclophane})(phen)_3][BF_4]_2$  (**3**) in  $CD_3NO_2$  at 25 °C.

The  $B(Ar^F)_4$  salt  $[Pd_3(\mu_3\text{-}[2.2]\text{paracyclophane})(phen)_3][B(Ar^F)_4]_2$  (**3'**), which was generated in  $CD_2Cl_2$  by treatment of **3** with  $NaB(Ar^F)_4$  showed a dynamic  $^1H$  NMR behavior (Figure S2). As described in the main text, the well-separated signals could not be obtained in the range of the temperature down to  $-90$  °C, and the signals of the phen protons were very broad at  $90$  °C. Presumably, two or more dynamic processes are involved in the processes. The  $^1H$  NMR spectral change in the temperature range of  $-90$  °C to  $20$  °C might involve an exchange process

which resulted in the averaging of two sets of phen ligands as well as of pairs of the coordinated or uncoordinated arene protons, as to make a formal pseudo-mirror plane in a molecule. The two coordinated arene signals or the two uncoordinated arene signals without  $^3J_{\text{H-H}}$  coupling at 23 °C may indicate that the chemical environments around two ipso carbons of the cyclophane become equivalent on the NMR time scale. In this case, the hydrogen atoms  $\text{H}_a$  and  $\text{H}_a'$  are equivalent, as are the hydrogen atoms  $\text{H}_b$  and  $\text{H}_b'$ .

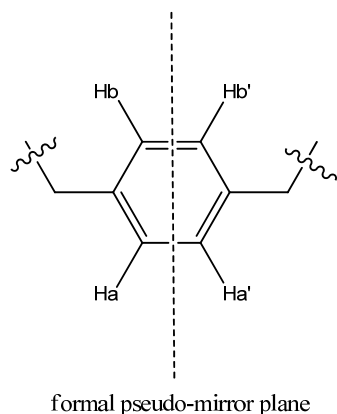

A few explanations for the NMR aspects are possible. Firstly, one major barrier to the structural change appears to come from steric interactions within the tripalladium-arene complex, particularly around the (phen)Pd1–Pd2(phen) framework. Secondly, the singlet pattern of the coordinated and uncoordinated arene protons at 23 °C may exclude a situation that dynamic processes result in different bonding and/or structural environments about the two ipso-carbons in each arene of the paracyclophane ligand. Thirdly, the facts that the NMR signals for two of three Pd(phen) units in **3'** are averaged at 23 °C and those for another Pd(phen) unit are not involved in the exchange event suggest that the dynamic NMR behavior may arise from the rapid exchange between two of three Pd(phen) units. One possible dynamic process, which is consistent with the observed signal pattern and variable temperature NMR behavior, is the rapid exchange between Pd3(phen) and one of the Pd(phen) units of the Pd<sub>2</sub> framework. In the process, the Pd1(phen) unit or the Pd2(phen) unit moves fluxionally between the two allylic coordination site (Scheme S1). It is known that intermolecular allyl ligand exchange between a  $\mu$ -allyl Pd–Pd complex [Pd<sub>2</sub>( $\mu$ -allyl)(PPh<sub>3</sub>)<sub>2</sub>( $\mu$ -Cl)] and a mononuclear allyl Pd complex [Pd(allyl)(PPh<sub>3</sub>)Cl] proceeds in an equilibrium manner.

On the other hand, the  $^1\text{H}$  NMR spectral change in the temperature range of 30 °C to 90 °C gives rise to averaging of all four protons of the coordinated or uncoordinated arene to a single signal. Significant broadening of the all phen proton signals may suggest that all three Pd(phen) units are involved in the exchange process.

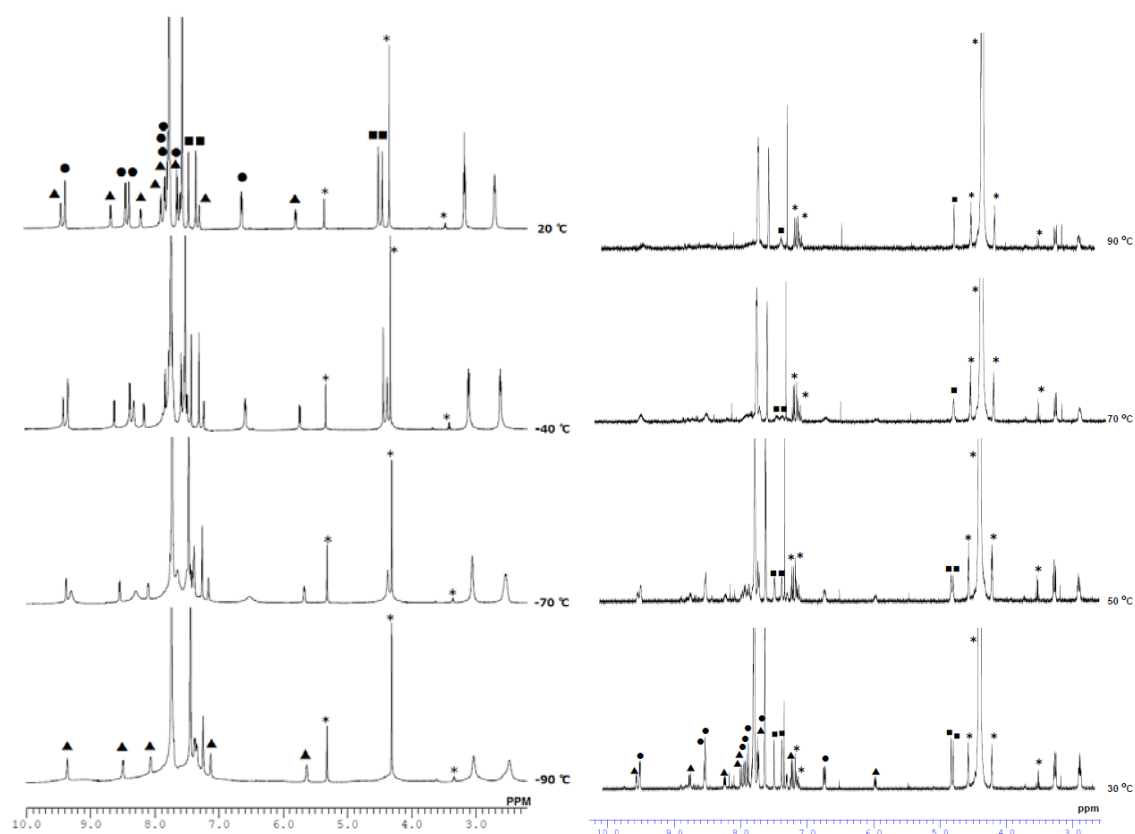

**Figure S2.** Variable Temperature  $^1\text{H}$  NMR spectra of **3'** (left:  $-90 \sim 20\text{ }^\circ\text{C}$  in  $\text{CD}_2\text{Cl}_2$ ; right:  $30 \sim 90\text{ }^\circ\text{C}$  in  $\text{CD}_3\text{NO}_2$ ) ( $\blacktriangle$  = a set of phen,  $\bullet$  = a set of phen,  $\blacksquare$  = arene protons, \* = dichloromethane, nitromethane, toluene, and  $\text{Et}_2\text{O}$ ).

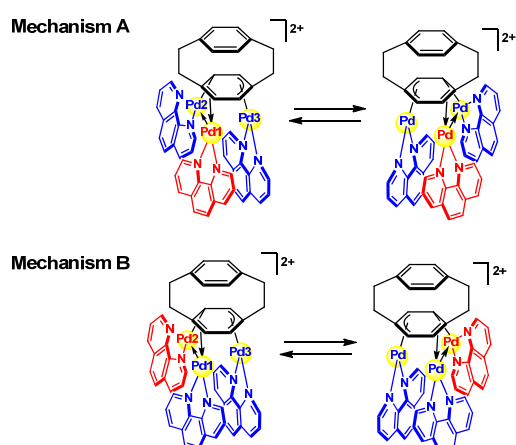

**Scheme S1.** Possible mechanisms for the dynamic behavior of **3'**. One of the two  $\text{Pd}(\text{phen})$  units (red) in the  $\text{Pd-Pd}$  moiety [mechanism A,  $\text{Pd1}(\text{phen})$ ; mechanism B,  $\text{Pd2}(\text{phen})$ ] moves between the two  $\pi$ -allylic sites.

**Synthesis of  $[\text{Pd}_3(\mu_3\text{-C}_7\text{H}_8)(\text{phen})_3][\text{BF}_4]_2$  (**5**):** To a solution of  $[\text{Pd}_3(\mu_3\text{-C}_7\text{H}_8)(\text{CH}_3\text{CN})_3][\text{BF}_4]_2$  (**4**) (100 mg, 0.125 mmol) in  $\text{CH}_3\text{NO}_2$  (ca. 3 mL) was added 1,10-phenanthroline (67.5 mg, 0.370 mmol) at room temperature. The mixture was stirred for 5 min, and the mixture was filtered. Crystallization from  $\text{CH}_3\text{NO}_2$ /benzene gave **5** (59.3 mg, 42% yield).  $^1\text{H}$  NMR (400 MHz,  $\text{CD}_3\text{NO}_2$ , 25 °C):  $\delta$  9.96 (d,  $^3J = 4.5$  Hz, 1H, phen), 9.54 (d,  $^3J = 5.0$  Hz, 1H, phen), 9.50 (d,  $^3J = 5.0$  Hz, 1H, phen), 9.44 (d,  $^3J = 5.0$  Hz, 1H, phen), 9.00 (d,  $^3J = 8.3$  Hz, 1H, phen), 8.79 (d,  $^3J = 8.0$  Hz, 1H, phen), 8.41 (m, 2H, phen), 8.34 (d,  $^3J = 8.5$  Hz, 1H, phen), 8.25 (m, 3H, phen), 8.09 (d,  $^3J = 8.5$  Hz, 1H, phen), 8.01 (d,  $^3J = 9.0$  Hz, 1H, phen), 7.83 (d,  $^3J = 8.8$  Hz, 1H, phen), 7.78-7.74 (m, 3H, phen), 7.71 (d,  $^3J = 8.0$  Hz, 1H, phen), 7.64 (d,  $^3J = 8.8$  Hz, 1H, phen), 7.36 (m, 1H, phen), 7.19 (dd,  $^3J = 5.0$  and 8.0 Hz, 1H, phen), 6.69 (dd,  $^3J = 4.8$ , 7.9 Hz, 1H, phen), 5.95 (dd,  $^3J = 5.0$  and 8.3 Hz, 1H, phen), 5.66 (dd,  $^3J = 8.0$  and 9.0 Hz, 1H, H<sub>5</sub>), 5.35 (dd,  $^3J = 8.0$  and 9.0 Hz, 1H, H<sub>6</sub>), 4.99 (dd,  $^3J = 8.0$  and 7.0 Hz, 1H, H<sub>7</sub>), 4.94 (dd,  $^3J = 8.3$  and 8.0 Hz, 1H, H<sub>4</sub>), 4.78 (dd,  $^3J = 8.3$  and 9.5 Hz, 1H, H<sub>3</sub>), 3.63 (m, 1H, H<sub>2</sub>), 3.32 (ddd,  $^2J = 19.3$  Hz,  $^3J = 7.0$  and 2.5 Hz, 1H, H<sub>1</sub>), 2.31 (m, 1H, H<sub>1</sub>).  $^{13}\text{C}\{^1\text{H}\}$  NMR (100.5 MHz,  $\text{CD}_3\text{NO}_2$ , 25 °C):  $\delta$  157.7 (s, phen), 154.2 (s, phen), 153.9 (s, phen), 153.2 (s, phen), 152.4 (s, phen), 150.9 (s, phen), 147.6 (s, phen), 147.4 (s, phen), 146.8 (s, phen), 145.7 (s, phen), 145.2 (s, phen), 140.7 (s, phen), 140.3 (s, phen), 140.0 (s, phen), 139.7 (s, phen), 139.3 (s, phen), 138.3 (s, phen), 132.0 (s, phen), 131.9 (s, phen), 131.6 (s, phen), 131.5 (s, phen), 130.4 (s, phen), 130.2 (s, phen), 129.7 (s, phen), 129.0 (s, phen), 128.9 (s, phen), 128.8 (s, phen), 128.7 (s, phen), 128.6 (s, phen), 128.5 (s, phen), 127.8 (s, phen), 127.7 (s, phen), 127.0 (s, phen), 126.2 (s, phen), 125.7 (s, phen), 125.0 (s, phen), 100.3 (s, C<sub>6</sub>), 85.3 (s, C<sub>5</sub>), 76.3 (s, C<sub>7</sub>), 73.4 (s, C<sub>3</sub>), 54.5 (s, C<sub>4</sub>), 40.5 (s, C<sub>2</sub>), 31.7 (s, C<sub>1</sub>). Anal. Calcd. for  $\text{C}_{43}\text{H}_{32}\text{B}_2\text{F}_8\text{N}_6\text{Pd}_3$ : C, 45.88; H, 2.87; N, 7.47. Found: C, 45.36; H, 3.07; N, 7.28.

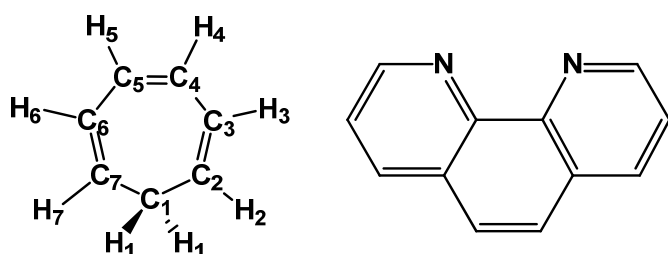

**Synthesis of  $[\text{Pd}_2(\mu\text{-C}_7\text{H}_8)(\text{CH}_3\text{CN})_4][\text{BF}_4]_2$  (**6-CH<sub>3</sub>CN**):** To solution of  $[\text{Pd}_2(\text{CH}_3\text{CN})_6][\text{BF}_4]_2$  (200.3 mg, 0.32 mmol) in  $\text{CH}_3\text{NO}_2$  (ca. 4 mL) was added

cycloheptatriene (29.5 mg, 0.32 mmol, 33.0  $\mu$ L) at room temperature. The mixture was stirred for 30 min, and mixture was filtered. Adding  $\text{CH}_2\text{Cl}_2$  and  $\text{Et}_2\text{O}$ , the solution was cooled at  $-20\text{ }^\circ\text{C}$  to give **6-CH<sub>3</sub>CN** (114.1 mg, 56%).  $^1\text{H}$  NMR (400 MHz,  $\text{CD}_3\text{CN}$ ,  $25\text{ }^\circ\text{C}$ ):  $\delta$  5.41 (m, 2H,  $\text{H}_4$ ), 5.16 (m, 2H,  $\text{H}_3$ ), 5.05 (m, 2H,  $\text{H}_2$ ), 2.19 (m, 1H,  $\text{H}_1$ ), 1.52 (m, 1H,  $\text{H}_1$ ).  $^{13}\text{C}\{^1\text{H}\}$  NMR (100.5 MHz,  $\text{CD}_3\text{CN}$ ,  $25\text{ }^\circ\text{C}$ ):  $\delta$  104.16 (s,  $\text{C}_3$ ), 83.12 (s,  $\text{C}_2$ ), 79.52 (s,  $\text{C}_4$ ), 32.32 (s,  $\text{C}_1$ ). Anal. Calcd. for  $\text{C}_{15}\text{H}_{20}\text{B}_2\text{F}_8\text{N}_4\text{Pd}_2$ : C, 28.03; H, 3.14; N, 8.72. Found: C, 27.69; H, 3.03; N, 8.44.

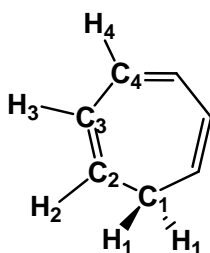

**Synthesis of  $[\text{Pd}_2(\mu\text{-C}_7\text{H}_8)(\text{phen})_2][\text{BF}_4]_2$  (**6-phen**):** To solution of  $[\text{Pd}_2(\text{CH}_3\text{CN})_6][\text{BF}_4]_2$  (99.9 mg, 0.16 mmol) in  $\text{CH}_3\text{NO}_2$  (ca. 8 mL) was added cycloheptatriene (14.29 mg, 0.16 mmol, 16.0  $\mu$ L) at room temperature, and the mixture was stirred for 30 min. 1,10-phenanthroline (57.0 mg, 0.32 mmol) was added and the reaction mixture was stirred for 1h. The reaction mixture was filtered and concentrated in vacuo. Addition of  $\text{Et}_2\text{O}$  to the solution gave the crude product. Crystallization from  $\text{CH}_3\text{NO}_2$ /toluene gave **6-phen** (94.9 mg, 71%).  $^1\text{H}$  NMR (400 MHz,  $\text{CD}_3\text{NO}_2$ ,  $25\text{ }^\circ\text{C}$ ):  $\delta$  9.14 (dd,  $^3J = 4.8\text{ Hz}$ ,  $^4J = 1.5\text{ Hz}$ , 2H,  $\text{H}_5$ ), 8.96 (dd,  $^3J = 5.0\text{ Hz}$ ,  $^4J = 1.3\text{ Hz}$ , 2H,  $\text{H}_5'$ ), 8.39 (dd,  $^3J = 8.3\text{ Hz}$ ,  $^4J = 1.3\text{ Hz}$ , 2H,  $\text{H}_7'$ ), 8.33 (dd,  $^3J = 8.3\text{ Hz}$ ,  $^4J = 1.5\text{ Hz}$ , 2H,  $\text{H}_7$ ), 7.75 (s, 4H,  $\text{H}_8$  and  $\text{H}_8'$ ), 7.69 (dd,  $^3J = 5.0$  and  $8.3\text{ Hz}$ , 2H,  $\text{H}_6'$ ), 7.66 (dd,  $^3J = 4.8$  and  $8.3\text{ Hz}$ , 2H,  $\text{H}_6$ ), 6.11 (m, 2H,  $\text{H}_4$ ), 5.68 (m, 2H,  $\text{H}_3$ ), 5.20 (m, 2H,  $\text{H}_2$ ), 3.00 (dt,  $^2J = 22.6\text{ Hz}$ ,  $^3J = 3.7\text{ Hz}$ , 1H,  $\text{H}_1$ ), 2.22 (dt,  $^2J = 22.6\text{ Hz}$ ,  $^3J = 3.9\text{ Hz}$ , 1H,  $\text{H}_1$ ).  $^{13}\text{C}\{^1\text{H}\}$  NMR (100.5 MHz,  $\text{CD}_3\text{NO}_2$ ,  $25\text{ }^\circ\text{C}$ ):  $\delta$  155.7 (s,  $\text{C}_5$ ), 153.8 (s,  $\text{C}_5'$ ), 145.5 (s,  $\text{C}_9'$ ), 144.7 (s,  $\text{C}_9$ ), 141.3 (s,  $\text{C}_7'$ ), 141.0 (s,  $\text{C}_7$ ), 130.9 (s,  $\text{C}_{10}'$ ), 130.6 (s,  $\text{C}_{10}$ ), 128.9 (s,  $\text{C}_8$ ), 128.7 (s,  $\text{C}_8'$ ), 127.7 (s,  $\text{C}_6$ ), 127.5 (s,  $\text{C}_6'$ ), 106.8 (s,  $\text{C}_3$ ), 82.4 (s,  $\text{C}_4$ ), 78.2 (s,  $\text{C}_2$ ), 31.8 (s,  $\text{C}_1$ ). Anal. Calcd. for  $\text{C}_{24}\text{H}_{25}\text{B}_1\text{F}_4\text{N}_2\text{Pt}_3$ : C, 44.38; H, 2.88; N, 6.68. Found: C, 43.99; H, 2.96; N, 6.66.

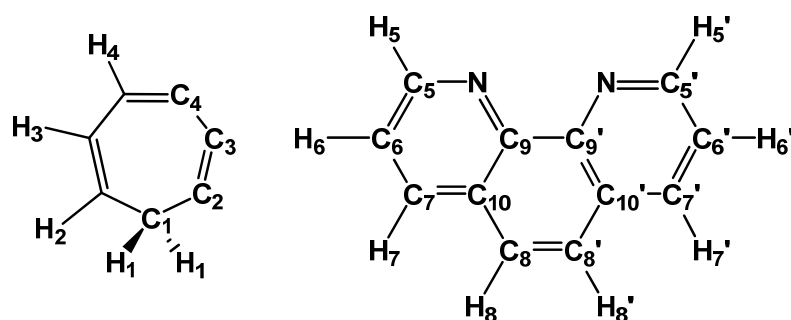

**Synthesis of  $[\text{Pd}_3(\mu_3\text{-C}_8\text{H}_8)(\text{phen})_3][\text{BF}_4]_2$  (**8**):** To a solution of cyclooctatetraene (48.6 mg, 0.47 mmol) in  $\text{CH}_3\text{NO}_2$  was added  $[\text{Pd}_2(\text{CH}_3\text{CN})_6][\text{BF}_4]_2$  (268 mg, 0.42 mmol) and 1,10-phenanthroline (153 mg, 0.85 mmol). Subsequently,  $\text{Pd}_2(\text{dba})_3$  (219 mg, 0.21 mmol) and 1,10-phenanthroline (76.3 mg, 0.42 mmol) were added to the reaction mixture. The mixture was stirred at ambient temperature for 2 h to give a deep blue solution. The mixture was filtered, and the filtrate was concentrated in vacuo. Addition of toluene afforded a deep blue powder of **8** (413 mg, 0.36 mmol) in 86% yield.  $^1\text{H}$  NMR (400 MHz,  $\text{CD}_3\text{NO}_2$ , 25 °C):  $\delta$  9.16 (4H, dd,  $J = 5$  Hz,  $J = 1$  Hz,  $\text{H}_4$ ), 8.48 (2H, dd,  $J = 5$  Hz,  $J = 1$  Hz,  $\text{H}_8$ ), 8.26 (4H, dd,  $J = 10$  Hz,  $J = 1$  Hz,  $\text{H}_6$ ), 8.01 (2H, dd,  $J = 10$  Hz,  $J = 1$  Hz,  $\text{H}_{10}$ ), 7.66 (4H, dd,  $J = 10$  Hz,  $J = 5$  Hz,  $\text{H}_5$ ), 7.60 (4H, s,  $\text{H}_7$ ), 7.43 (2H, s,  $\text{H}_{11}$ ), 7.39 (2H, dd,  $J = 10$  Hz,  $J = 5$  Hz,  $\text{H}_9$ ), 6.37 (4H, t,  $J = 6$  Hz,  $\text{H}_2$ ), 6.03 (2H, t,  $J = 6$  Hz,  $\text{H}_3$ ), 2.42 (2H, t,  $J = 6$  Hz,  $\text{H}_1$ ).  $^{13}\text{C}\{^1\text{H}\}$  NMR (100.6 MHz,  $\text{CD}_3\text{NO}_2$ , 25 °C):  $\delta$  156.0 (s,  $\text{C}_4$ ), 148.6 (s,  $\text{C}_8$ ), 145.3 (s,  $\text{C}_{13}$ ), 144.6 (s,  $\text{C}_{15}$ ), 139.4 (s,  $\text{C}_6$ ), 138.8 (s,  $\text{C}_{10}$ ), 130.9 (s,  $\text{C}_{12}$ ), 130.0 (s,  $\text{C}_{14}$ ), 128.1 (s,  $\text{C}_7$ ), 127.8 (s,  $\text{C}_{11}$ ), 126.4 (s,  $\text{C}_5$ ), 125.6 (s,  $\text{C}_9$ ), 106.6 (s,  $\text{C}_3$ ), 93.5 (s,  $\text{C}_2$ ), 22.1 (s,  $\text{C}_1$ ). Anal. Calcd. for  $\text{C}_{44}\text{H}_{32}\text{B}_2\text{F}_8\text{N}_6\text{Pd}_3 \cdot \text{CH}_3\text{NO}_2$ : C, 45.09; H, 2.94; N, 8.18. Found: C, 45.55; H, 3.08; N, 7.82.

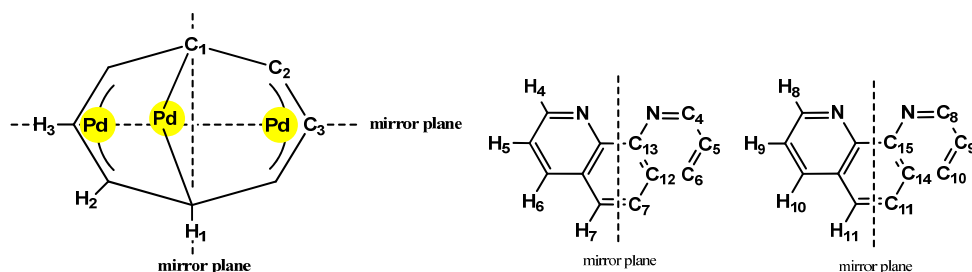

The  $\text{PF}_6$  salt  $[\text{Pd}_3(\mu_3\text{-cyclooctatetraene})(\text{phen})_3][\text{PF}_6]_2$  (**5'**) was obtained by a similar method using  $[\text{Pd}_2(\text{CH}_3\text{CN})_6][\text{PF}_6]_2$  as the starting material. Anal. Calcd. for  $\text{C}_{44}\text{H}_{32}\text{P}_2\text{F}_{12}\text{N}_6\text{Pd}_3 \cdot$

CH<sub>3</sub>NO<sub>2</sub>: C, 42.14; H, 2.57; N, 6.70. Found: C, 41.80; H, 2.72; N, 6.75.

**Synthesis of [Pd<sub>2</sub>(μ-C<sub>8</sub>H<sub>8</sub>)(phen)<sub>2</sub>][BF<sub>4</sub>]<sub>2</sub> (9-phen):** To a solution of cyclooctatetraene (50 mg, 0.48 mmol) in CH<sub>3</sub>NO<sub>2</sub> was added [Pd<sub>2</sub>(CH<sub>3</sub>CN)<sub>6</sub>][BF<sub>4</sub>]<sub>2</sub> (304 mg, 0.48 mmol) and 1,10-phenanthroline (173 mg, 0.96 mmol). The mixture was filtered, and crystallization from CH<sub>3</sub>NO<sub>2</sub>/benzene gave a yellow powder of **9-phen** (175 mg, 0.21 mmol) in 43% yield. <sup>1</sup>H NMR spectra of **9-phen** at 25 °C showed broad signals for phen and COT protons due to a dynamic process of **9-phen** (Figure S3). <sup>1</sup>H and <sup>13</sup>C{<sup>1</sup>H} NMR assignment by using Variable Temperature measurement with aid of COSY and HSQC was done for **9'-phen** (see below). Anal. Calcd. For C<sub>32</sub>H<sub>24</sub>B<sub>2</sub>F<sub>8</sub>N<sub>4</sub>Pd<sub>2</sub>: C, 45.16; H, 2.84; N, 6.58. Found: C, 44.92; H, 3.03; N, 6.73.

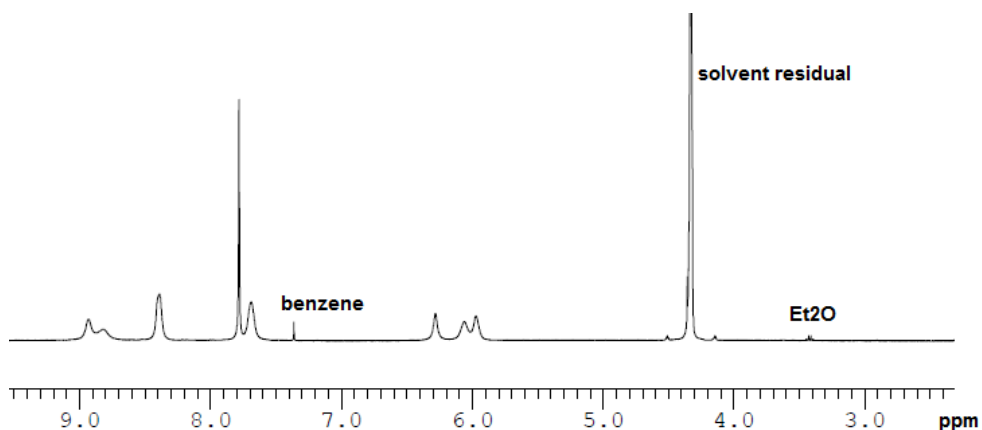

**Figure S3.** A <sup>1</sup>H NMR spectrum of [Pd<sub>2</sub>(μ-C<sub>8</sub>H<sub>8</sub>)(phen)<sub>2</sub>][BF<sub>4</sub>]<sub>2</sub> (**9-phen**).

The B(Ar<sup>F</sup>)<sub>4</sub> salt [Pd<sub>2</sub>(μ-C<sub>8</sub>H<sub>8</sub>)(phen)<sub>2</sub>][B(Ar<sup>F</sup>)<sub>4</sub>]<sub>2</sub> (**9'-phen**) was obtained by treatment of **9-phen** with NaB(Ar<sup>F</sup>)<sub>4</sub> (2 equiv.) in CH<sub>2</sub>Cl<sub>2</sub>. <sup>1</sup>H NMR (600 MHz, CD<sub>2</sub>Cl<sub>2</sub>, -60 °C): For the COT protons; δ 5.97-5.93 (4H, br), 5.74 (1H, br), 5.64 (2H, br), 2.82 (1H, br). 13 resonances were observed for phen protons (three signals overlap with those of B(Ar<sup>F</sup>)<sub>4</sub> anions). <sup>13</sup>C{<sup>1</sup>H} NMR (151 MHz, CD<sub>2</sub>Cl<sub>2</sub>, -60 °C): For the COT carbons; δ 145.8 (s), 129.4 (s), 110.0 (s), 102.0 (s), 92.3 (s), 92.2 (s) 75.7 (s), 47.5 (s).

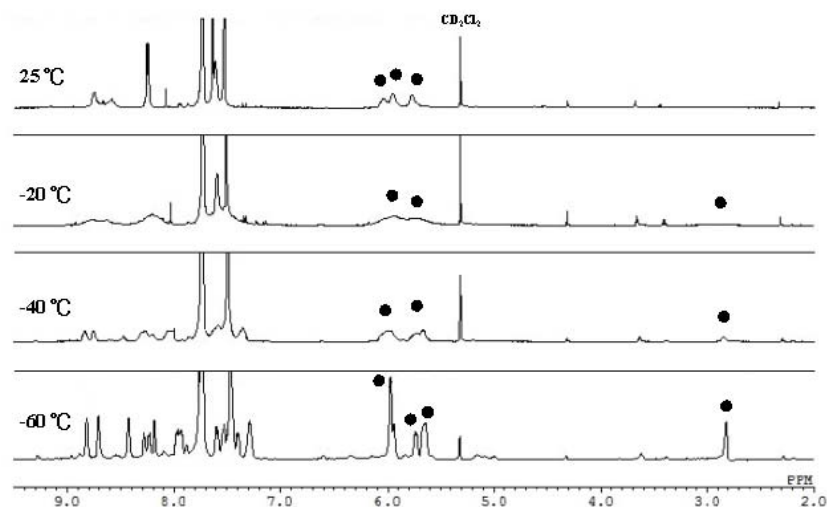

**Figure S4.** Variable Temperature  $^1\text{H}$  NMR spectra of **9'-phen** in  $\text{CD}_2\text{Cl}_2$ .

**Synthesis of  $[\text{Pd}_3(\mu_3\text{-dihydropentalenediyl})(\text{phen})_3][\text{BF}_4]_2$  (**10**):** A deep blue solution of  $[\text{Pd}_3(\mu\text{-cyclooctatetraene})(\text{phen})_3][\text{BF}_4]_2$  (36.6 mg, 0.032 mmol) in  $\text{CH}_3\text{NO}_2$  was heated at 55  $^\circ\text{C}$  for 5 h. The resultant red mixture was filtered, and the volatiles were removed in vacuo. Crystallization from  $\text{CH}_3\text{CN}/\text{CH}_3\text{NO}_2/\text{benzene}$  gave orange microcrystals of **6** (28.1 mg) in 77% yield. A  $^1\text{H}$  NMR spectrum (400 MHz,  $\text{CD}_3\text{NO}_2$ , 25  $^\circ\text{C}$ ) is shown in Figure S4. At 25  $^\circ\text{C}$ , only averaged signals were observed except for central allylic protons, due to the dynamic process of **10**.  $^1\text{H}$  and  $^{13}\text{C}\{^1\text{H}\}$  NMR assignment by using Variable Temperature measurement with aid of COSY and HSQC was done for **10'** (see below). ESI-MS spectrum is shown in Figure S5. Anal. Calcd. for  $\text{C}_{44}\text{H}_{32}\text{B}_2\text{F}_8\text{N}_6\text{Pd}_3$ : C, 46.45; H, 2.84; N, 7.39. Found: C, 45.59; H, 3.08; N, 7.36.

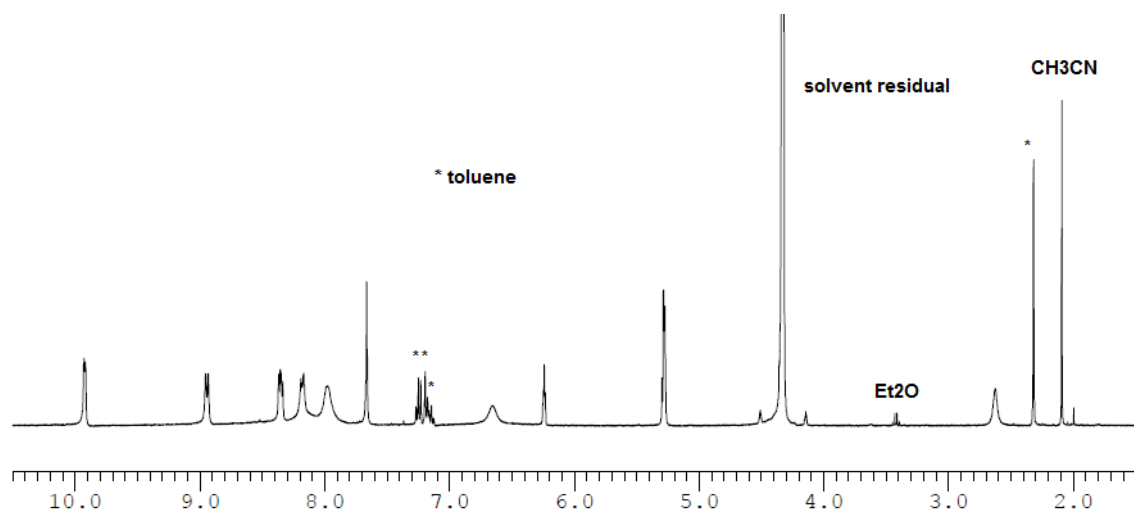

**Figure S5.** A  $^1\text{H}$  NMR spectrum of  $[\text{Pd}_3(\mu_3\text{-dihydropentalenediyl})(\text{phen})_3][\text{BF}_4]_2$  (**10**) in  $\text{CD}_3\text{NO}_2$  at  $25^\circ\text{C}$ .

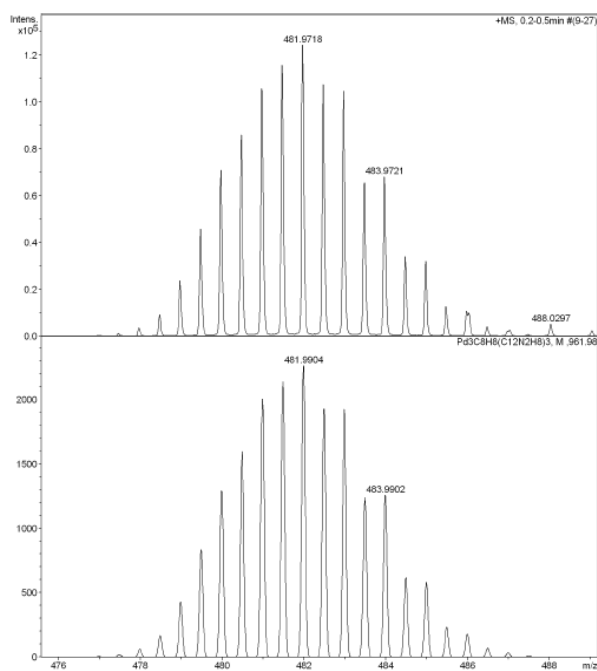

**Figure S6.** Experimental (top) and calculated (bottom) ESI(+)-mass spectrum of  $[\text{Pd}_3(\mu_3\text{-dihydropentalenediyl})(\text{phen})_3][\text{BF}_4]_2$  (**10**).

The  $\text{B}(\text{Ar}^{\text{F}})_4$  salt  $[\text{Pd}_3(\mu_3\text{-dihydropentalenediyl})(\text{phen})_3][\text{B}(\text{Ar}^{\text{F}})_4]_2$  (**10'**) was obtained by treatment of **10** with  $\text{NaB}(\text{Ar}^{\text{F}})_4$  (2 equiv.) in  $\text{CH}_2\text{Cl}_2$ .  $^1\text{H}$  NMR (600 MHz,  $\text{CD}_2\text{Cl}_2$ ,  $-60^\circ\text{C}$ :  $\delta$  9.66 (1H, d,  $J = 4$  Hz, phen), 9.59 (1H, d,  $J = 4$  Hz, phen), 8.93 (1H, d,  $J = 5$  Hz, phen), 8.72

(1H, d,  $J = 8$  Hz, phen), 8.63 (1H, d,  $J = 5$  Hz, phen), 8.58 (1H, d,  $J = 8$  Hz, phen), 8.20 (1H, dd,  $J = 8$  Hz,  $J = 5$  Hz, phen), 8.13-8.10 (2H, m, phen), 7.97 (1H, d,  $J = 8$  Hz, phen), 7.80-7.78 (2H, m, phen), 7.75 (B(Ar<sup>F</sup>)<sub>4</sub>), 7.58-7.56 (2H, m, phen), 7.45-7.43 (B(Ar<sup>F</sup>)<sub>4</sub> + phen), 7.39 (1H, d,  $J = 8$  Hz, phen), 7.35-7.30 (2H, two d,  $J = 9$  Hz, phen), 7.18 (1H, d,  $J = 4$  Hz, phen), 7.07 (1H, dd,  $J = 8$  Hz,  $J = 5$  Hz, phen), 6.85 (1H, d,  $J = 4$  Hz, phen), 6.57 (1H, dd,  $J = 8$  Hz,  $J = 5$  Hz, phen), 6.14 (1H, phen), 5.93 (1H, br s, H7), 5.55 (1H, dd,  $J = 8$  Hz,  $J = 5$  Hz, phen), 5.12 (1H, t,  $J = 5$  Hz, H3), 4.92 (1H, br s, H6 or H8), 4.80 (1H, br s, H6 or H8), 4.46 (1H, t,  $J = 5$  Hz, H2), 3.82 (1H, br t, H4), 2.62 (br t, H5), 2.35 (br t, H1). <sup>13</sup>C{<sup>1</sup>H} NMR (151 MHz, CD<sub>2</sub>Cl<sub>2</sub>, -80 °C): δ 105.6 (s, C7), 81.1 (s, C3), 81.1 (s, C6 or C8), 79.5 (s, C6 or C8), 57.4 (s, C5), 56.2 (s, C1), 52.1 (s, C2), 46.0 (s, C4).

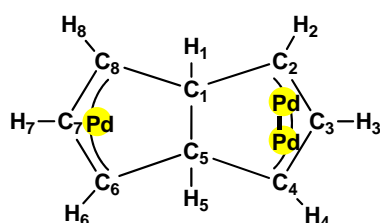

The dynamic NMR behavior observed for **10** and **10'** might be due to the exchange between two Pd-phen moieties of the Pd-Pd unit.

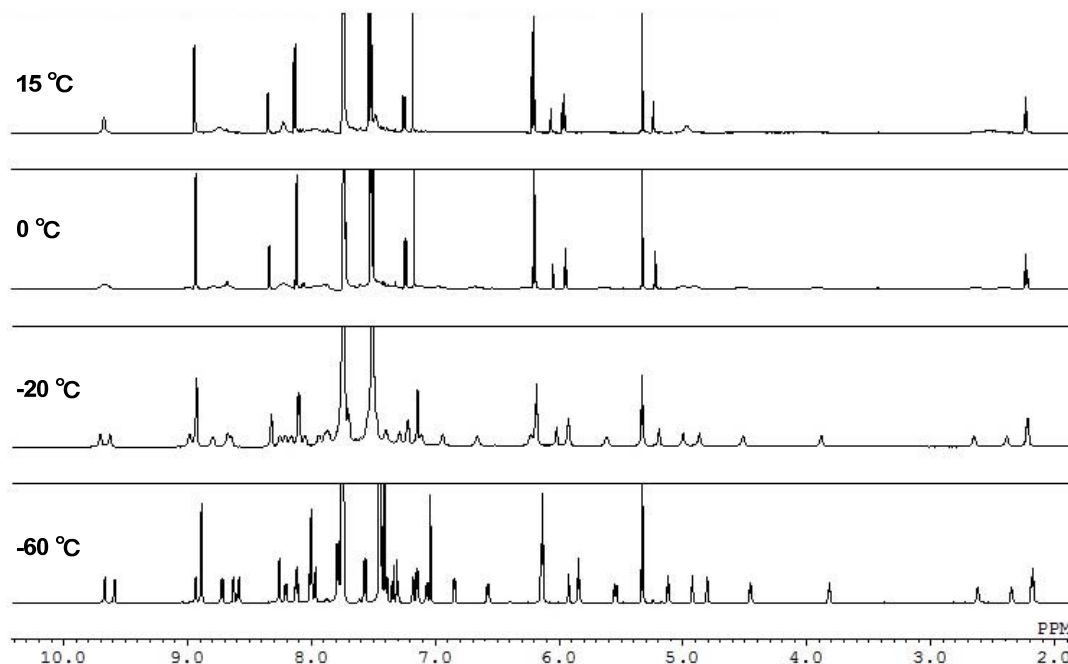

**Figure S7.** Variable Temperature <sup>1</sup>H NMR spectra of **10'** in CD<sub>2</sub>Cl<sub>2</sub>.

**Synthesis of  $[\text{Pd}_2(\mu\text{-dihydropentalenediyl})(\text{phen})_2][\text{BF}_4]_2$  (**11**):** To a solution of  $[\text{Pd}_2(\text{CH}_3\text{CN})_6][\text{BF}_4]_2$  (272 mg, 0.43 mmol) in  $\text{CH}_3\text{NO}_2$  was added COT (44.7 mg, 0.43 mmol) and 2 equiv of 1,10-phenanthroline (155 mg, 0.86 mmol). To the mixture was added 5 mol% of  $\text{Pd}(\text{dba})(\text{phen})$  (25.7 mg, 0.021 mmol). The mixture was heated at 60 °C for 6 h, and filtered. The filtrate was concentrated in vacuo. Crystallization from  $\text{CH}_3\text{NO}_2$ /benzene gave an orange powder of **11** (266 mg) in 73% yield.  $^1\text{H}$  NMR (400 MHz,  $\text{CD}_3\text{NO}_2$ , 25 °C):  $\delta$  9.01 (4H, dd,  $J = 5$  Hz,  $J = 1$  Hz, H4), 8.27 (4H, dd,  $J = 8$  Hz,  $J = 1$  Hz, H6), 7.68 (4H, s, H7), 7.60 (4H, dd,  $J = 8$  Hz,  $J = 5$  Hz, H5), 6.70 (2H, t,  $J = 3$  Hz, H3), 5.64 (4H, t,  $J = 2$  Hz, H2), 2.34 (2H, m, H1). A  $^1\text{H}$  NMR spectrum is shown in Figure S6.  $^{13}\text{C}\{^1\text{H}\}$  NMR (100.6 MHz,  $\text{CD}_3\text{NO}_2$ , 25 °C):  $\delta$  155.4 (s, C4), 144.7 (s, C9), 140.9 (s, C6), 130.5 (s, C8), 128.6 (s, C7), 127.3 (s, C5), 115.6 (s, C3), 83.3 (s, C2), 58.9 (s, C1). ESI-MS spectrum is shown in Figure S7. Anal. Calcd. for  $\text{C}_{32}\text{H}_{24}\text{B}_2\text{F}_8\text{N}_4\text{Pd}_2$ : C, 45.16; H, 2.84; N, 6.58. Found: C, 46.14; H, 3.40; N, 6.43.

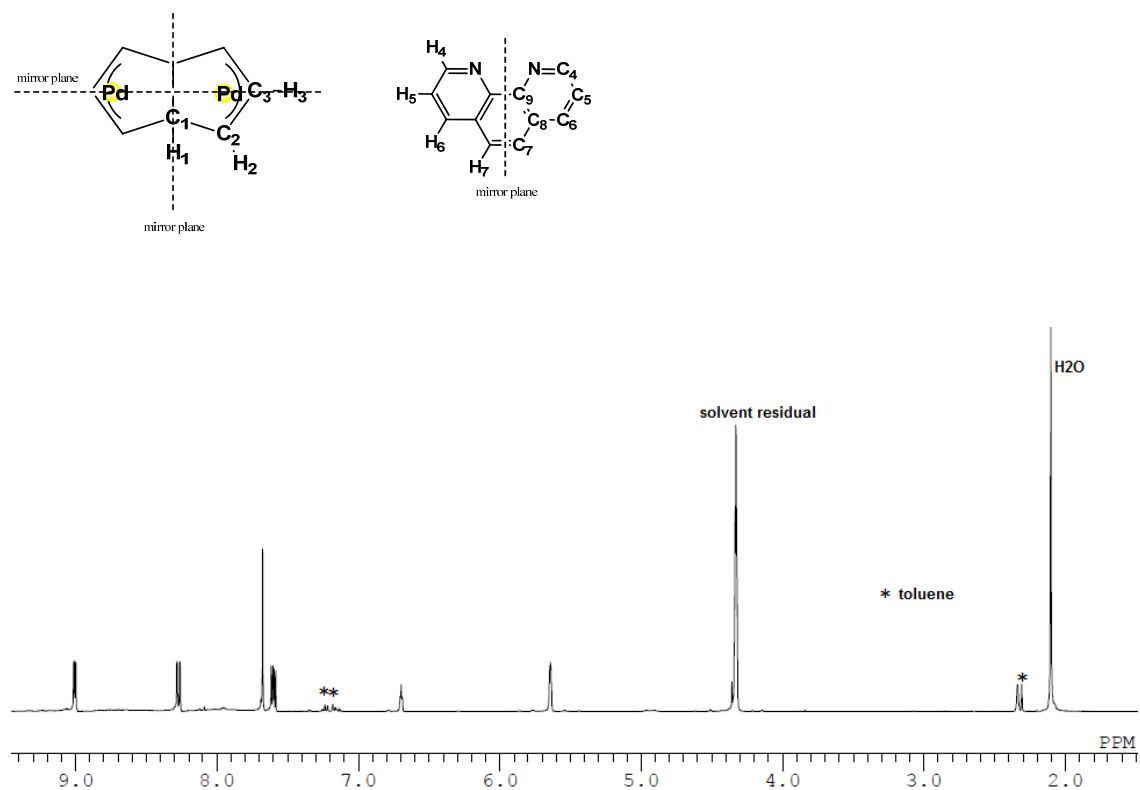

**Figure S8.** A  $^1\text{H}$  NMR spectrum of  $[\text{Pd}_2(\mu\text{-dihydropentalenediyl})(\text{phen})_2][\text{BF}_4]_2$  (**11**) in  $\text{CD}_3\text{NO}_2$ .

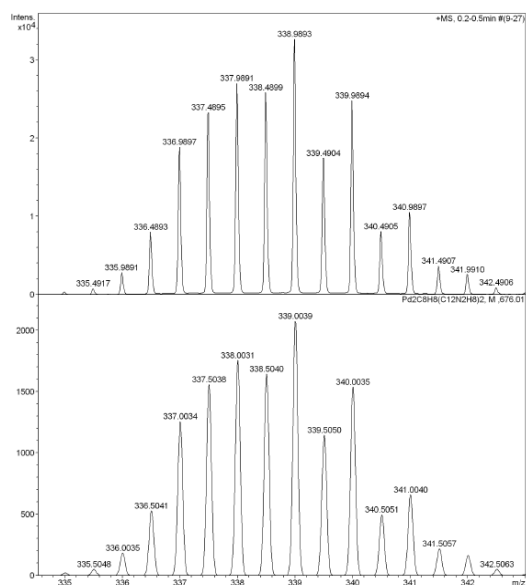

**Figure S9.** Experimental (top) and calculated (bottom) ESI(+)-mass spectra of  $[\text{Pd}_2(\mu\text{-dihydropentalenediyl})(\text{phen})_2][\text{BF}_4]_2$  (**11**).

#### Kinetic Data for the conversion of **8** to **10**.

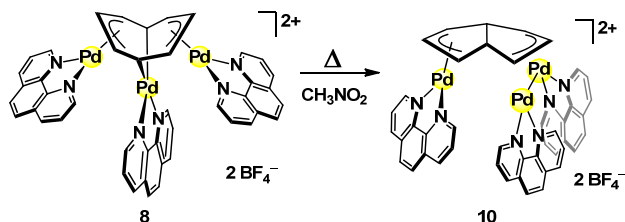

The sample of **8** ( $1.0 \times 10^{-4}$  M) was prepared in a drybox in  $\text{CH}_3\text{NO}_2$ , and change of the absorbance at 700 nm was monitored. The rate constant was independent on the concentration of **8** at 60 °C ( $1.0 \times 10^{-4}$  M,  $k = 2.21 \times 10^{-4} \text{ s}^{-1}$ ;  $2.0 \times 10^{-4}$  M,  $k = 2.19 \times 10^{-4} \text{ s}^{-1}$ ;  $3.0 \times 10^{-4}$  M,  $k = 2.15 \times 10^{-4} \text{ s}^{-1}$ ).

**Table S1.** Rate constants and half -lives for the conversion of **8** to **10**.

| temp. /°C | rate const. $k$ /s <sup>-1</sup> | $t_{1/2}$ /min |
|-----------|----------------------------------|----------------|
| 70        | $6.21 \times 10^{-4}$            | 19             |
| 65        | $3.38 \times 10^{-4}$            | 34             |
| 60        | $2.21 \times 10^{-4}$            | 52             |
| 55        | $1.12 \times 10^{-4}$            | 103            |

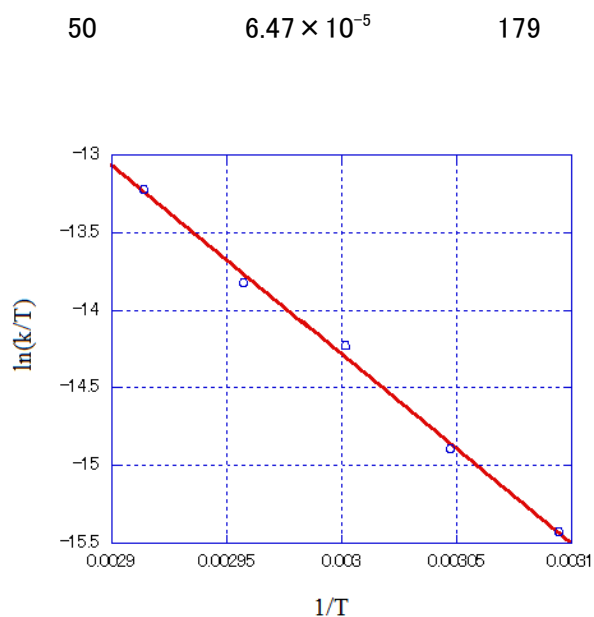

**Figure S10.** An Eyring Plot for the conversion of **8** to **10**.

## References

- (1) T. Murahashi, T. Nagai, T. Okuno, T. Matsutani, H. Kurosawa, *Chem. Commun.* **2000**, 1689.
- (2) N. A. Yakelis, R. G. Bergman, *Organometallics*, **2005**, 24, 3579.
- (3) T. Murahashi, K. Shirato, A. Fukushima, K. Takase, T. Suenobu, S. Fukuzumi, S. Ogoshi, H. Kurosawa, *Nat. Chem.* **2012**, 4, 52.

## X-ray Crystallographic Data for [Pd<sub>3</sub>(μ<sub>3</sub>-[2.2]paracyclophane)(phen)<sub>3</sub>][BF<sub>4</sub>]<sub>2</sub> (3)

### A. Crystal Data

|                      |                                                                                                                                              |
|----------------------|----------------------------------------------------------------------------------------------------------------------------------------------|
| Empirical Formula    | C <sub>54</sub> H <sub>49</sub> B <sub>2</sub> F <sub>8</sub> N <sub>8</sub> O <sub>4</sub> Pd <sub>3</sub>                                  |
| Formula Weight       | 1366.84                                                                                                                                      |
| Crystal Color, Habit | red, block                                                                                                                                   |
| Crystal Dimensions   | 0.180 X 0.180 X 0.150 mm                                                                                                                     |
| Crystal System       | triclinic                                                                                                                                    |
| Lattice Type         | Primitive                                                                                                                                    |
| Lattice Parameters   | a = 16.270(2) Å<br>b = 16.700(2) Å<br>c = 22.126(3) Å<br>α = 81.787(3) °<br>β = 71.232(3) °<br>γ = 64.084(3) °<br>V = 5120(1) Å <sup>3</sup> |
| Space Group          | P-1 (#2)                                                                                                                                     |
| Z value              | 4                                                                                                                                            |
| D <sub>calc</sub>    | 1.773 g/cm <sup>3</sup>                                                                                                                      |
| F <sub>000</sub>     | 2724.00                                                                                                                                      |
| μ(MoKα)              | 11.293 cm <sup>-1</sup>                                                                                                                      |

### B. Intensity Measurements

|                                       |                                                                       |
|---------------------------------------|-----------------------------------------------------------------------|
| Diffractometer                        | R-AXIS RAPID                                                          |
| Radiation                             | MoKα (λ = 0.71075 Å)<br>graphite monochromated                        |
| Voltage, Current                      | 50kV, 40mA                                                            |
| Temperature                           | -150.0°C                                                              |
| Detector Aperture                     | 280 x 256 mm                                                          |
| Data Images                           | 74 exposures                                                          |
| ω oscillation Range (χ=45.0, φ=0.0)   | 130.0 - 190.0°                                                        |
| Exposure Rate                         | 100.0 sec./°                                                          |
| ω oscillation Range (χ=45.0, φ=180.0) | 0.0 - 162.0°                                                          |
| Exposure Rate                         | 100.0 sec./°                                                          |
| Detector Position                     | 127.00 mm                                                             |
| Pixel Size                            | 0.100 mm                                                              |
| 2θ <sub>max</sub>                     | 55.0°                                                                 |
| No. of Reflections Measured           | Total: 51000<br>Unique: 23379 (R <sub>int</sub> = 0.0300)             |
| Corrections                           | Lorentz-polarization<br>Absorption<br>(trans. factors: 0.597 - 0.844) |

### C. Structure Solution and Refinement

|                                       |                                                                                                                       |
|---------------------------------------|-----------------------------------------------------------------------------------------------------------------------|
| Structure Solution                    | Patterson Methods (DIRDIF99 PATTY)                                                                                    |
| Refinement                            | Full-matrix least-squares on $F^2$                                                                                    |
| Function Minimized                    | $\sum w (F_o^2 - F_c^2)^2$                                                                                            |
| Least Squares Weights                 | $w = 1 / [ \sigma^2(F_o^2) + (0.0503 \cdot P)^2 + 24.2543 \cdot P ]$<br>where $P = (\text{Max}(F_o^2, 0) + 2F_c^2)/3$ |
| $2\theta_{\text{max}}$ cutoff         | 55.0°                                                                                                                 |
| Anomalous Dispersion                  | All non-hydrogen atoms                                                                                                |
| No. Observations (All reflections)    | 23379                                                                                                                 |
| No. Variables                         | 1409                                                                                                                  |
| Reflection/Parameter Ratio            | 16.59                                                                                                                 |
| Residuals: R1 ( $I > 2.00\sigma(I)$ ) | 0.0450                                                                                                                |
| Residuals: R (All reflections)        | 0.0538                                                                                                                |
| Residuals: wR2 (All reflections)      | 0.1254                                                                                                                |
| Goodness of Fit Indicator             | 1.076                                                                                                                 |
| Max Shift/Error in Final Cycle        | 0.001                                                                                                                 |
| Maximum peak in Final Diff. Map       | 1.73 e-/Å <sup>3</sup>                                                                                                |
| Minimum peak in Final Diff. Map       | -1.39 e-/Å <sup>3</sup>                                                                                               |

**X-ray Crystallographic Data for [Pd<sub>3</sub>(μ<sub>3</sub>–cycloheptatriene)(phen)<sub>3</sub>][BF<sub>4</sub>]<sub>2</sub> (5)**

A. Crystal Data

|                      |                                                                                                                                              |
|----------------------|----------------------------------------------------------------------------------------------------------------------------------------------|
| Empirical Formula    | C <sub>50</sub> H <sub>41</sub> B <sub>2</sub> F <sub>8</sub> N <sub>7</sub> O <sub>2</sub> Pd <sub>3</sub>                                  |
| Formula Weight       | 1264.73                                                                                                                                      |
| Crystal Color, Habit | orange, block                                                                                                                                |
| Crystal Dimensions   | 0.200 X 0.100 X 0.100 mm                                                                                                                     |
| Crystal System       | triclinic                                                                                                                                    |
| Lattice Type         | Primitive                                                                                                                                    |
| Lattice Parameters   | a = 12.978(5) Å<br>b = 14.106(5) Å<br>c = 14.993(6) Å<br>α = 83.662(6) °<br>β = 65.457(4) °<br>γ = 70.420(6) °<br>V = 2351(2) Å <sup>3</sup> |
| Space Group          | P-1 (#2)                                                                                                                                     |
| Z value              | 2                                                                                                                                            |
| D <sub>calc</sub>    | 1.786 g/cm <sup>3</sup>                                                                                                                      |
| F <sub>000</sub>     | 1252.00                                                                                                                                      |
| μ(MoKα)              | 12.180 cm <sup>-1</sup>                                                                                                                      |

B. Intensity Measurements

|                                       |                                                                       |
|---------------------------------------|-----------------------------------------------------------------------|
| Diffractometer                        | R-AXIS RAPID                                                          |
| Radiation                             | MoKα (λ = 0.71075 Å)<br>graphite monochromated                        |
| Voltage, Current                      | 50kV, 40mA                                                            |
| Temperature                           | -150.0°C                                                              |
| Detector Aperture                     | 280 x 256 mm                                                          |
| Data Images                           | 55 exposures                                                          |
| ω oscillation Range (χ=45.0, φ=90.0)  | 130.0 - 190.0°                                                        |
| Exposure Rate                         | 120.0 sec./°                                                          |
| ω oscillation Range (χ=45.0, φ=270.0) | 0.0 - 160.0°                                                          |
| Exposure Rate                         | 120.0 sec./°                                                          |
| Detector Position                     | 127.40 mm                                                             |
| Pixel Size                            | 0.100 mm                                                              |
| 2θ <sub>max</sub>                     | 55.0°                                                                 |
| No. of Reflections Measured           | Total: 23216<br>Unique: 10707 (R <sub>int</sub> = 0.0801)             |
| Corrections                           | Lorentz-polarization<br>Absorption<br>(trans. factors: 0.550 - 0.885) |

### C. Structure Solution and Refinement

|                                          |                                                              |
|------------------------------------------|--------------------------------------------------------------|
| Structure Solution                       | Patterson Methods (DIRDIF99 PATTY)                           |
| Refinement                               | Full-matrix least-squares on $F^2$                           |
| Function Minimized                       | $\sum w (F_o^2 - F_c^2)^2$                                   |
| Least Squares Weights parameters         | Chebyshev polynomial with 3<br>1986.6000,2772.2400,821.8180, |
| $2\theta_{\text{max}}$ cutoff            | 55.00                                                        |
| Anomalous Dispersion                     | All non-hydrogen atoms                                       |
| No. Observations ( $I > 2.00\sigma(I)$ ) | 5576                                                         |
| No. Variables                            | 667                                                          |
| Reflection/Parameter Ratio               | 8.36                                                         |
| Residuals: R1 ( $I > 2.00\sigma(I)$ )    | 0.0503                                                       |
| Residuals: wR2 ( $I > 2.00\sigma(I)$ )   | 0.0992                                                       |
| Goodness of Fit Indicator                | 0.739                                                        |
| Max Shift/Error in Final Cycle           | 0.000                                                        |
| Maximum peak in Final Diff. Map          | 1.26 e-/Å <sup>3</sup>                                       |
| Minimum peak in Final Diff. Map          | -1.15 e-/Å <sup>3</sup>                                      |

# X-ray Crystallographic Data for [Pd<sub>2</sub>(μ-cycloheptatriene)(CH<sub>3</sub>CN)<sub>4</sub>][BF<sub>4</sub>]<sub>2</sub> (6-CH<sub>3</sub>CN)

## A. Crystal Data

|                      |                                                                                                              |
|----------------------|--------------------------------------------------------------------------------------------------------------|
| Empirical Formula    | C <sub>16</sub> H <sub>22</sub> B <sub>2</sub> Cl <sub>2</sub> F <sub>8</sub> N <sub>4</sub> Pd <sub>2</sub> |
| Formula Weight       | 727.69                                                                                                       |
| Crystal Color, Habit | yellow, block                                                                                                |
| Crystal Dimensions   | 0.200 X 0.200 X 0.100 mm                                                                                     |
| Crystal System       | monoclinic                                                                                                   |
| Lattice Type         | Primitive                                                                                                    |
| Lattice Parameters   | a = 6.9325(8) Å<br>b = 21.863(2) Å<br>c = 17.529(2) Å<br>β = 103.236(3) °<br>V = 2586.2(5) Å <sup>3</sup>    |
| Space Group          | P2 <sub>1</sub> /c (#14)                                                                                     |
| Z value              | 4                                                                                                            |
| D <sub>calc</sub>    | 1.869 g/cm <sup>3</sup>                                                                                      |
| F <sub>000</sub>     | 1416.00                                                                                                      |
| μ(MoKα)              | 16.676 cm <sup>-1</sup>                                                                                      |

## B. Intensity Measurements

|                                       |                                                                       |
|---------------------------------------|-----------------------------------------------------------------------|
| Diffractometer                        | R-Axis RAPID                                                          |
| Radiation                             | MoKα (λ = 0.71075 Å)<br>graphite monochromated                        |
| Voltage, Current                      | 50kV, 40mA                                                            |
| Temperature                           | -150.0°C                                                              |
| Detector Aperture                     | 280 x 256 mm                                                          |
| Data Images                           | 44 exposures                                                          |
| ω oscillation Range (χ=45.0, ψ=120.0) | 130.0 - 190.0°                                                        |
| Exposure Rate                         | 100.0 sec./°                                                          |
| ω oscillation Range (χ=45.0, ψ=270.0) | 0.0 - 160.0°                                                          |
| Exposure Rate                         | 100.0 sec./°                                                          |
| Detector Position                     | 127.40 mm                                                             |
| Pixel Size                            | 0.100 mm                                                              |
| 2θ <sub>max</sub>                     | 54.9°                                                                 |
| No. of Reflections Measured           | Total: 20167<br>Unique: 4552 (R <sub>int</sub> = 0.0989)              |
| Corrections                           | Lorentz-polarization<br>Absorption<br>(trans. factors: 0.039 - 0.846) |

C. Structure Solution and Refinement

|                                     |                                                                                                                      |
|-------------------------------------|----------------------------------------------------------------------------------------------------------------------|
| Structure Solution                  | Patterson Methods (DIRDIF99 PATTY)                                                                                   |
| Refinement                          | Full-matrix least-squares on F <sup>2</sup>                                                                          |
| Function Minimized                  | $\sum w (F_o^2 - F_c^2)^2$                                                                                           |
| Least Squares Weights               | $w = 1 / [ \sigma^2(F_o^2) + (0.1573 \cdot P)^2 + 1.2421 \cdot P ]$<br>where $P = (\text{Max}(F_o^2, 0) + 2F_c^2)/3$ |
| 2 $\theta_{\text{max}}$ cutoff      | 50.0 <sup>o</sup>                                                                                                    |
| Anomalous Dispersion                | All non-hydrogen atoms                                                                                               |
| No. Observations (All reflections)  | 4552                                                                                                                 |
| No. Variables                       | 311                                                                                                                  |
| Reflection/Parameter Ratio          | 14.64                                                                                                                |
| Residuals: R1 (I>2.00 $\sigma$ (I)) | 0.0654                                                                                                               |
| Residuals: R (All reflections)      | 0.0984                                                                                                               |
| Residuals: wR2 (All reflections)    | 0.2433                                                                                                               |
| Goodness of Fit Indicator           | 1.075                                                                                                                |
| Max Shift/Error in Final Cycle      | 0.001                                                                                                                |
| Maximum peak in Final Diff. Map     | 1.36 e-/Å <sup>3</sup>                                                                                               |
| Minimum peak in Final Diff. Map     | -2.68 e-/Å <sup>3</sup>                                                                                              |

## X-ray Crystallographic Data for [Pd<sub>2</sub>( $\mu$ -cycloheptatriene)(phen)<sub>2</sub>][BF<sub>4</sub>]<sub>2</sub> (6-phen)

### A. Crystal Data

|                       |                                                                                                                                                                       |
|-----------------------|-----------------------------------------------------------------------------------------------------------------------------------------------------------------------|
| Empirical Formula     | C <sub>32</sub> H <sub>27</sub> B <sub>2</sub> F <sub>8</sub> N <sub>5</sub> O <sub>2</sub> Pd <sub>2</sub>                                                           |
| Formula Weight        | 900.00                                                                                                                                                                |
| Crystal Color, Habit  | orange, block                                                                                                                                                         |
| Crystal Dimensions    | 0.200 X 0.200 X 0.150 mm                                                                                                                                              |
| Crystal System        | triclinic                                                                                                                                                             |
| Lattice Type          | Primitive                                                                                                                                                             |
| Lattice Parameters    | a = 11.016(2) Å<br>b = 12.327(2) Å<br>c = 13.836(2) Å<br>$\alpha$ = 113.360(4) °<br>$\beta$ = 104.512(4) °<br>$\gamma$ = 102.553(4) °<br>V = 1560.2(4) Å <sup>3</sup> |
| Space Group           | P-1 (#2)                                                                                                                                                              |
| Z value               | 2                                                                                                                                                                     |
| D <sub>calc</sub>     | 1.916 g/cm <sup>3</sup>                                                                                                                                               |
| F <sub>000</sub>      | 888.00                                                                                                                                                                |
| $\mu$ (MoK $\alpha$ ) | 12.434 cm <sup>-1</sup>                                                                                                                                               |

### B. Intensity Measurements

|                                                           |                                                                       |
|-----------------------------------------------------------|-----------------------------------------------------------------------|
| Diffractometer                                            | R-AXIS RAPID                                                          |
| Radiation                                                 | MoK $\alpha$ ( $\lambda$ = 0.71075 Å)<br>graphite monochromated       |
| Voltage, Current                                          | 50kV, 40mA                                                            |
| Temperature                                               | -150.0°C                                                              |
| Detector Aperture                                         | 280 x 256 mm                                                          |
| Data Images                                               | 44 exposures                                                          |
| $\omega$ oscillation Range ( $\chi$ =45.0, $\phi$ =0.0)   | 130.0 - 190.0°                                                        |
| Exposure Rate                                             | 100.0 sec./°                                                          |
| $\omega$ oscillation Range ( $\chi$ =45.0, $\phi$ =180.0) | 0.0 - 160.0°                                                          |
| Exposure Rate                                             | 100.0 sec./°                                                          |
| Detector Position                                         | 127.40 mm                                                             |
| Pixel Size                                                | 0.100 mm                                                              |
| 2 $\theta$ <sub>max</sub>                                 | 54.9°                                                                 |
| No. of Reflections Measured                               | Total: 12298<br>Unique: 5460 (R <sub>int</sub> = 0.0576)              |
| Corrections                                               | Lorentz-polarization<br>Absorption<br>(trans. factors: 0.625 - 0.830) |

### C. Structure Solution and Refinement

|                                       |                                                                                                                       |
|---------------------------------------|-----------------------------------------------------------------------------------------------------------------------|
| Structure Solution                    | Patterson Methods (DIRDIF99 PATTY)                                                                                    |
| Refinement                            | Full-matrix least-squares on $F^2$                                                                                    |
| Function Minimized                    | $\sum w (F_o^2 - F_c^2)^2$                                                                                            |
| Least Squares Weights                 | $w = 1 / [ \sigma^2(F_o^2) + (0.0001 \cdot P)^2 + 36.4146 \cdot P ]$<br>where $P = (\text{Max}(F_o^2, 0) + 2F_c^2)/3$ |
| $2\theta_{\text{max}}$ cutoff         | 50.0°                                                                                                                 |
| Anomalous Dispersion                  | All non-hydrogen atoms                                                                                                |
| No. Observations (All reflections)    | 5460                                                                                                                  |
| No. Variables                         | 461                                                                                                                   |
| Reflection/Parameter Ratio            | 11.84                                                                                                                 |
| Residuals: R1 ( $I > 2.00\sigma(I)$ ) | 0.0750                                                                                                                |
| Residuals: R (All reflections)        | 0.0955                                                                                                                |
| Residuals: wR2 (All reflections)      | 0.2036                                                                                                                |
| Goodness of Fit Indicator             | 1.172                                                                                                                 |
| Max Shift/Error in Final Cycle        | 0.000                                                                                                                 |
| Maximum peak in Final Diff. Map       | 1.61 e-/Å <sup>3</sup>                                                                                                |
| Minimum peak in Final Diff. Map       | -1.90 e-/Å <sup>3</sup>                                                                                               |

## X-ray Crystallographic Data for [Pd<sub>3</sub>(μ<sub>3</sub>-cyclooctatetraene)(phen)<sub>3</sub>][PF<sub>6</sub>]<sub>2</sub> (8')

### A. Crystal Data

|                      |                                                                                                                                                   |
|----------------------|---------------------------------------------------------------------------------------------------------------------------------------------------|
| Empirical Formula    | C <sub>48</sub> H <sub>38</sub> F <sub>12</sub> N <sub>8</sub> P <sub>2</sub> Pd <sub>3</sub>                                                     |
| Formula Weight       | 1336.01                                                                                                                                           |
| Crystal Color, Habit | blue, platelet                                                                                                                                    |
| Crystal Dimensions   | 0.100 X 0.100 X 0.050 mm                                                                                                                          |
| Crystal System       | triclinic                                                                                                                                         |
| Lattice Type         | Primitive                                                                                                                                         |
| Lattice Parameters   | a = 11.8333(7) Å<br>b = 14.0677(7) Å<br>c = 15.8338(8) Å<br>α = 70.703(2) °<br>β = 89.832(2) °<br>γ = 70.362(2) °<br>V = 2325.6(2) Å <sup>3</sup> |
| Space Group          | P-1 (#2)                                                                                                                                          |
| Z value              | 2                                                                                                                                                 |
| D <sub>calc</sub>    | 1.908 g/cm <sup>3</sup>                                                                                                                           |
| F <sub>000</sub>     | 1316.00                                                                                                                                           |
| μ(MoKα)              | 13.124 cm <sup>-1</sup>                                                                                                                           |

### B. Intensity Measurements

|                                       |                                                                       |
|---------------------------------------|-----------------------------------------------------------------------|
| Diffractometer                        | R-AXIS RAPID                                                          |
| Radiation                             | MoKα (λ = 0.71075 Å)                                                  |
| Voltage, Current                      | 50kV, 24mA                                                            |
| Temperature                           | -170.0°C                                                              |
| Detector Aperture                     | 280 x 256 mm                                                          |
| Data Images                           | 55 exposures                                                          |
| ω oscillation Range (χ=45.0, φ=0.0)   | 130.0 - 190.0°                                                        |
| Exposure Rate                         | 30.0 sec./°                                                           |
| ω oscillation Range (χ=45.0, φ=180.0) | 0.0 - 160.0°                                                          |
| Exposure Rate                         | 30.0 sec./°                                                           |
| Detector Position                     | 127.40 mm                                                             |
| Pixel Size                            | 0.100 mm                                                              |
| 2θ <sub>max</sub>                     | 55.0°                                                                 |
| No. of Reflections Measured           | Total: 22744<br>Unique: 10598 (R <sub>int</sub> = 0.0551)             |
| Corrections                           | Lorentz-polarization<br>Absorption<br>(trans. factors: 0.535 - 0.936) |

### C. Structure Solution and Refinement

|                                       |                                                                                                                      |
|---------------------------------------|----------------------------------------------------------------------------------------------------------------------|
| Structure Solution                    | Patterson Methods (DIRDIF99 PATTY)                                                                                   |
| Refinement                            | Full-matrix least-squares on F <sup>2</sup>                                                                          |
| Function Minimized                    | $\sum w (F_o^2 - F_c^2)^2$                                                                                           |
| Least Squares Weights                 | $w = 1 / [ \sigma^2(F_o^2) + (0.2000 \cdot P)^2 + 0.0000 \cdot P ]$<br>where $P = (\text{Max}(F_o^2, 0) + 2F_c^2)/3$ |
| 2 $\theta_{\text{max}}$ cutoff        | 55.0°                                                                                                                |
| Anomalous Dispersion                  | All non-hydrogen atoms                                                                                               |
| No. Observations (All reflections)    | 10598                                                                                                                |
| No. Variables                         | 660                                                                                                                  |
| Reflection/Parameter Ratio            | 16.06                                                                                                                |
| Residuals: R1 ( $I > 2.00\sigma(I)$ ) | 0.0599                                                                                                               |
| Residuals: R (All reflections)        | 0.0748                                                                                                               |
| Residuals: wR2 (All reflections)      | 0.2102                                                                                                               |
| Goodness of Fit Indicator             | 0.830                                                                                                                |
| Max Shift/Error in Final Cycle        | 0.000                                                                                                                |
| Maximum peak in Final Diff. Map       | 1.42 e <sup>-</sup> /Å <sup>3</sup>                                                                                  |
| Minimum peak in Final Diff. Map       | -3.29 e <sup>-</sup> /Å <sup>3</sup>                                                                                 |

**X-ray Crystallographic Data for [Pd<sub>3</sub>(μ<sub>3</sub>-dihydropentalenediyl)(phen)<sub>3</sub>][BF<sub>4</sub>]<sub>2</sub> (10)**

*EXPERIMENTAL DETAILS*

A. Crystal Data

|                      |                                                                                                                                               |
|----------------------|-----------------------------------------------------------------------------------------------------------------------------------------------|
| Empirical Formula    | C <sub>50</sub> H <sub>41</sub> B <sub>2</sub> F <sub>8</sub> N <sub>9</sub> Pd <sub>3</sub>                                                  |
| Formula Weight       | 1260.74                                                                                                                                       |
| Crystal Color, Habit | yellow, block                                                                                                                                 |
| Crystal Dimensions   | 0.100 X 0.080 X 0.080 mm                                                                                                                      |
| Crystal System       | triclinic                                                                                                                                     |
| Lattice Type         | Primitive                                                                                                                                     |
| Lattice Parameters   | a = 10.708(3) Å<br>b = 15.246(4) Å<br>c = 16.514(4) Å<br>α = 115.265(5) °<br>β = 98.940(5) °<br>γ = 98.087(6) °<br>V = 2343(1) Å <sup>3</sup> |
| Space Group          | P-1 (#2)                                                                                                                                      |
| Z value              | 2                                                                                                                                             |
| D <sub>calc</sub>    | 1.787 g/cm <sup>3</sup>                                                                                                                       |
| F <sub>000</sub>     | 1248.00                                                                                                                                       |
| μ(MoKα)              | 12.200 cm <sup>-1</sup>                                                                                                                       |

B. Intensity Measurements

|                                       |                                                                       |
|---------------------------------------|-----------------------------------------------------------------------|
| Diffractometer                        | R-AXIS RAPID                                                          |
| Radiation                             | MoKα (λ = 0.71075 Å)<br>graphite monochromated                        |
| Voltage, Current                      | 50kV, 40mA                                                            |
| Temperature                           | -150.0°C                                                              |
| Detector Aperture                     | 280 x 256 mm                                                          |
| Data Images                           | 88 exposures                                                          |
| ω oscillation Range (χ=45.0, φ=0.0)   | 130.0 - 190.0°                                                        |
| Exposure Rate                         | 150.0 sec./°                                                          |
| ω oscillation Range (χ=45.0, φ=180.0) | 0.0 - 160.0°                                                          |
| Exposure Rate                         | 150.0 sec./°                                                          |
| Detector Position                     | 127.40 mm                                                             |
| Pixel Size                            | 0.100 mm                                                              |
| 2θ <sub>max</sub>                     | 55.0°                                                                 |
| No. of Reflections Measured           | Total: 19078<br>Unique: 8968 (R <sub>int</sub> = 0.0702)              |
| Corrections                           | Lorentz-polarization<br>Absorption<br>(trans. factors: 0.501 - 0.907) |

C. Structure Solution and Refinement

|                                       |                                                                                                                       |
|---------------------------------------|-----------------------------------------------------------------------------------------------------------------------|
| Structure Solution                    | Patterson Methods (DIRDIF99 PATTY)                                                                                    |
| Refinement                            | Full-matrix least-squares on $F^2$                                                                                    |
| Function Minimized                    | $\Sigma w (F_o^2 - F_c^2)^2$                                                                                          |
| Least Squares Weights                 | $w = 1 / [ \sigma^2(F_o^2) + (0.0993 \cdot P)^2 + 13.8518 \cdot P ]$<br>where $P = (\text{Max}(F_o^2, 0) + 2F_c^2)/3$ |
| $2\theta_{\text{max}}$ cutoff         | 52.0°                                                                                                                 |
| Anomalous Dispersion                  | All non-hydrogen atoms                                                                                                |
| No. Observations (All reflections)    | 8968                                                                                                                  |
| No. Variables                         | 651                                                                                                                   |
| Reflection/Parameter Ratio            | 13.78                                                                                                                 |
| Residuals: R1 ( $I > 2.00\sigma(I)$ ) | 0.0813                                                                                                                |
| Residuals: R (All reflections)        | 0.1198                                                                                                                |
| Residuals: wR2 (All reflections)      | 0.2118                                                                                                                |
| Goodness of Fit Indicator             | 1.049                                                                                                                 |
| Max Shift/Error in Final Cycle        | 0.001                                                                                                                 |
| Maximum peak in Final Diff. Map       | 2.75 e <sup>-</sup> /Å <sup>3</sup>                                                                                   |
| Minimum peak in Final Diff. Map       | -1.06 e <sup>-</sup> /Å <sup>3</sup>                                                                                  |
